# Supplementary material for: Long-term outcomes of autoimmune pancreatitis: a multicentre, international analysis
Source: HighWire-hosted journal article supplement (doi:10.1136/gutjnl-2012-303617), 2012-12-11
Supplement: gutjnl-2012-303617supp_table1.pdf [file gutjnl-2012-303617supp_table1.pdf]

| <b>Diagnosis</b>                                  | <b>Primary Basis for Diagnosis</b> | <b>Imaging Evidence</b>  | <b>Collateral Evidence</b>                                          |
|---------------------------------------------------|------------------------------------|--------------------------|---------------------------------------------------------------------|
| Definitive type 1 AIP                             | Histology                          | Typical/indeterminate    | Histologically confirmed LPSP (level 1 H)                           |
|                                                   | Imaging                            | Typical<br>Indeterminate | Any non-D level 1/level 2<br>Two or more from level 1 (+level 2 D*) |
|                                                   | Response to steroid                | Indeterminate            | Level 1 S/OOI + Rt or level 1 D + level 2 S/OOI/H + Rt              |
| Probable type 1 AIP                               |                                    | Indeterminate            | Level 2 S/OOI/H + Rt                                                |
| *Level 2 D is counted as level 1 in this setting. |                                    |                          |                                                                     |
