# Supplementary material for: Long-term outcomes of autoimmune pancreatitis: a multicentre, international analysis
Source: HighWire-hosted journal article supplement (doi:10.1136/gutjnl-2012-303617), 2012-12-11
Supplement: gutjnl-2012-303617supp_table2.pdf [file gutjnl-2012-303617supp_table2.pdf]

|                                                                                                                                                                                                                                                                                                                                                                                                                                                                                                                                                                                                                                                                                                                                                                                                        | Criterion                 | Level 1                                                                                                                                                                                                                                                                                                                                                                                                                                                                                                   | Level 2                                                                                                                                                                                                                                                                                                                                                                                                                                                                                           |
|--------------------------------------------------------------------------------------------------------------------------------------------------------------------------------------------------------------------------------------------------------------------------------------------------------------------------------------------------------------------------------------------------------------------------------------------------------------------------------------------------------------------------------------------------------------------------------------------------------------------------------------------------------------------------------------------------------------------------------------------------------------------------------------------------------|---------------------------|-----------------------------------------------------------------------------------------------------------------------------------------------------------------------------------------------------------------------------------------------------------------------------------------------------------------------------------------------------------------------------------------------------------------------------------------------------------------------------------------------------------|---------------------------------------------------------------------------------------------------------------------------------------------------------------------------------------------------------------------------------------------------------------------------------------------------------------------------------------------------------------------------------------------------------------------------------------------------------------------------------------------------|
| P                                                                                                                                                                                                                                                                                                                                                                                                                                                                                                                                                                                                                                                                                                                                                                                                      | Parenchymal imaging       | Typical:<br>Diffuse enlargement with delayed enhancement (sometimes associated with rim-like enhancement)                                                                                                                                                                                                                                                                                                                                                                                                 | Indeterminate (including atypical <sup>1</sup> ):<br>Segmental/focal enlargement with delayed enhancement                                                                                                                                                                                                                                                                                                                                                                                         |
| D                                                                                                                                                                                                                                                                                                                                                                                                                                                                                                                                                                                                                                                                                                                                                                                                      | Ductal imaging (ERP)      | Long (>1/3 length of the main pancreatic duct) or multiple strictures without marked upstream dilatation                                                                                                                                                                                                                                                                                                                                                                                                  | Segmental/focal narrowing without marked upstream dilatation (duct size, <5 mm)                                                                                                                                                                                                                                                                                                                                                                                                                   |
| S                                                                                                                                                                                                                                                                                                                                                                                                                                                                                                                                                                                                                                                                                                                                                                                                      | Serology                  | IgG4, >2× upper limit of normal value                                                                                                                                                                                                                                                                                                                                                                                                                                                                     | IgG4, 1–2× upper limit of normal value                                                                                                                                                                                                                                                                                                                                                                                                                                                            |
| OOI                                                                                                                                                                                                                                                                                                                                                                                                                                                                                                                                                                                                                                                                                                                                                                                                    | Other organ involvement   | a or b<br>a. Histology of extrapancreatic organs<br>Any three of the following:<br>(1) Marked lymphoplasmacytic infiltration with fibrosis and without granulocytic infiltration<br>(2) Storiform fibrosis<br>(3) Obliterative phlebitis<br>(4) Abundant (>10 cells/HPF) IgG4-positive cells<br><br>b. Typical radiological evidence<br>At least one of the following:<br>(1) Segmental/multiple proximal (hilar/intrahepatic) or proximal and distal bile duct stricture<br>(2) Retroperitoneal fibrosis | a or b<br>a. Histology of extrapancreatic organs including endoscopic biopsies of bile duct <sup>2</sup> :<br>Both of the following:<br>(1) Marked lymphoplasmacytic infiltration without granulocytic infiltration<br>(2) Abundant (>10 cells/HPF) IgG4-positive cells<br><br>b. Physical or radiological evidence<br>At least one of the following:<br>(1) Symmetrically enlarged salivary/lachrymal glands<br>(2) Radiological evidence of renal involvement described in association with AIP |
| H                                                                                                                                                                                                                                                                                                                                                                                                                                                                                                                                                                                                                                                                                                                                                                                                      | Histology of the pancreas | LPSP (core biopsy/resection)<br>At least 3 of the following:<br>(1) Periductal lymphoplasmacytic infiltrate without granulocytic infiltration<br>(2) Obliterative phlebitis<br>(3) Storiform fibrosis<br>(4) Abundant (>10 cells/HPF) IgG4-positive cells                                                                                                                                                                                                                                                 | LPSP (core biopsy)<br>Any 2 of the following:<br>(1) Periductal lymphoplasmacytic infiltrate without granulocytic infiltration<br>(2) Obliterative phlebitis<br>(3) Storiform fibrosis<br>(4) Abundant (>10 cells/HPF) IgG4-positive cells                                                                                                                                                                                                                                                        |
| Diagnostic steroid trial                                                                                                                                                                                                                                                                                                                                                                                                                                                                                                                                                                                                                                                                                                                                                                               |                           |                                                                                                                                                                                                                                                                                                                                                                                                                                                                                                           |                                                                                                                                                                                                                                                                                                                                                                                                                                                                                                   |
|                                                                                                                                                                                                                                                                                                                                                                                                                                                                                                                                                                                                                                                                                                                                                                                                        | Response to steroid (Rt)* | Rapid (≤2 wk) radiologically demonstrable resolution or marked improvement in pancreatic/extrapancreatic manifestations                                                                                                                                                                                                                                                                                                                                                                                   |                                                                                                                                                                                                                                                                                                                                                                                                                                                                                                   |
| <p>*Diagnostic steroid trial should be conducted carefully by pancreatologists with caveats (see text) only after negative workup for cancer including endoscopic ultrasound-guided fine needle aspiration.</p> <p><sup>1</sup>Atypical: Some AIP cases may show low-density mass, pancreatic ductal dilatation, or distal atrophy. Such atypical imaging findings in patients with obstructive jaundice and/or pancreatic mass are highly suggestive of pancreatic cancer. Such patients should be managed as pancreatic cancer unless there is strong collateral evidence for AIP, and a thorough workup for cancer is negative (see algorithm).</p> <p><sup>2</sup>Endoscopic biopsy of duodenal papilla is a useful adjunctive method because ampulla often is involved pathologically in AIP.</p> |                           |                                                                                                                                                                                                                                                                                                                                                                                                                                                                                                           |                                                                                                                                                                                                                                                                                                                                                                                                                                                                                                   |
