# Supplementary material for: Long-term outcomes of autoimmune pancreatitis: a multicentre, international analysis
Source: HighWire-hosted journal article supplement (doi:10.1136/gutjnl-2012-303617), 2012-12-11
Supplement: gutjnl-2012-303617supp_table3.pdf [file gutjnl-2012-303617supp_table3.pdf]

| <b>Diagnosis</b>      | <b>Imaging Evidence</b> | <b>Collateral Evidence</b>                                                                        |
|-----------------------|-------------------------|---------------------------------------------------------------------------------------------------|
| Definitive type 2 AIP | Typical/indeterminate   | Histologically confirmed IDCP (level 1 H) or clinical inflammatory bowel disease + level 2 H + Rt |
| Probable type 2 AIP   | Typical/indeterminate   | Level 2 H/clinical inflammatory bowel disease + Rt                                                |
