# Supplementary material for: Long-term outcomes of autoimmune pancreatitis: a multicentre, international analysis
Source: HighWire-hosted journal article supplement (doi:10.1136/gutjnl-2012-303617), 2012-12-11
Supplement: gutjnl-2012-303617supp_table4.pdf [file gutjnl-2012-303617supp_table4.pdf]

| Criterion                                                                                                                                                                                                                                                                                                                                                                                                                        |                                                   | Level 1                                                                                                                                                                                          | Level 2                                                                                                                                        |
|----------------------------------------------------------------------------------------------------------------------------------------------------------------------------------------------------------------------------------------------------------------------------------------------------------------------------------------------------------------------------------------------------------------------------------|---------------------------------------------------|--------------------------------------------------------------------------------------------------------------------------------------------------------------------------------------------------|------------------------------------------------------------------------------------------------------------------------------------------------|
| P                                                                                                                                                                                                                                                                                                                                                                                                                                | Parenchymal imaging                               | Typical:<br>Diffuse enlargement with delayed enhancement (sometimes associated with rim-like enhancement)                                                                                        | Indeterminate (including atypical <sup>†</sup> ):<br>Segmental/focal enlargement with delayed enhancement                                      |
| D                                                                                                                                                                                                                                                                                                                                                                                                                                | Ductal imaging (ERP)                              | Long (>1/3 length of the main pancreatic duct) or multiple strictures without marked upstream dilatation                                                                                         | Segmental/focal narrowing without marked upstream dilatation (duct size, <5 mm)                                                                |
| OOI                                                                                                                                                                                                                                                                                                                                                                                                                              | Other organ involvement                           |                                                                                                                                                                                                  | Clinically diagnosed inflammatory bowel disease                                                                                                |
| H                                                                                                                                                                                                                                                                                                                                                                                                                                | Histology of the pancreas (core biopsy/resection) | IDCP:<br>Both of the following:<br>(1) Granulocytic infiltration of duct wall (GEL) with or without granulocytic acinar inflammation<br>(2) Absent or scant (0–10 cells/HPF) IgG4-positive cells | Both of the following:<br>(1) Granulocytic and lymphoplasmacytic acinar infiltrate<br>(2) Absent or scant (0–10 cells/HPF) IgG4-positive cells |
| Diagnostic steroid trial                                                                                                                                                                                                                                                                                                                                                                                                         |                                                   |                                                                                                                                                                                                  |                                                                                                                                                |
| Response to steroid (Rt)*                                                                                                                                                                                                                                                                                                                                                                                                        |                                                   | Rapid ( $\leq 2$ wk) radiologically demonstrable resolution or marked improvement in manifestations                                                                                              |                                                                                                                                                |
| *Diagnostic steroid trial should be conducted carefully by pancreatologists with caveats (see text) only after negative workup for cancer including endoscopic ultrasound-guided fine needle aspiration.                                                                                                                                                                                                                         |                                                   |                                                                                                                                                                                                  |                                                                                                                                                |
| <sup>†</sup> Atypical: Some AIP cases may show low-density mass, pancreatic ductal dilatation, or distal atrophy. Such atypical imaging findings in patients with obstructive jaundice and/or pancreatic mass are highly suggestive of pancreatic cancer. Such patients should be managed as pancreatic cancer unless there is strong collateral evidence for AIP, and a thorough workup for cancer is negative (see algorithm). |                                                   |                                                                                                                                                                                                  |                                                                                                                                                |
